# Supplementary material
Source: publisher figshare collection journal article supplement (https://karger.figshare.com/ndownloader/files/26420597)
Supplement: Supplementary file 1 [file 26420597]

# Appendices

## Appendix A

Database: Ovid MEDLINE(R) In-Process & Other Non-Indexed Citations and Ovid MEDLINE(R) <1946 to Present> Search Strategy:

--------------------------------------------------------------------------------

1 exp Brain Injuries/ (55378)

2 (TBI* or mTBI*).mp. [mp=title, abstract, original title, name of substance word, subject heading word, keyword heading word, protocol supplementary concept word, rare disease supplementary concept word, unique identifier] (19199)

3 ((brain* or encephalon* or cranium or cranio* or cranial or intracrani* or intra-crani* or skull* or cerebral or cerebell* or head or ventric* or hemispher* or pontine or putamin* or dura* or subdura* or sub-dura* or ((supra or extra) adj2 dura*) or supradura* or epidura* or epi-dura* or arachnoid* or sub-arachnoid* or subarachnoid* or (intra adj2 arachnoid*)) adj3 (injur* or trauma* or concussion* or post-concussion* or h?emorrhag* or h?ematom* or bleed* or penetrat* or (non adj2 penetrat*) or edema* or oedema* or fracture* or aneurysm* or pressur* or lesion* or swell* or contusion*)).mp. [mp=title, abstract, original title, name of substance word, subject heading word, keyword heading word, protocol supplementary concept word, rare disease supplementary concept word, unique identifier] (301951)

4 Neurosurgery/ or exp craniotomy/ or decompressive craniectomy/ or trephining/ (25821)

5 (neurosurg* or neuro-surg* or craniotom* or craniectom* or trepanation* or trepanning* or trephination* or trephining*).mp. [mp=title, abstract, original title, name of substance word, subject heading word, keyword heading word, protocol supplementary concept word, rare disease supplementary concept word, unique identifier] (76298)

6 brain injury, chronic/ or brain edema/ or exp brain concussion/ or contrecoup injury/ or post-concussion syndrome/ or exp brain hemorrhage, traumatic/ or brain stem hemorrhage, traumatic/ or craniocerebral trauma/ or cerebral hemorrhage, traumatic/ or pneumocephalus/ or exp intracranial hemorrhages/ or exp cerebral hemorrhage/ or putaminal hemorrhage/ or exp intracranial hemorrhage, hypertensive/ or exp intracranial hemorrhage, traumatic/ or exp hematoma, epidural, cranial/ or exp hematoma, subdural/ or hematoma, subdural, acute/ or hematoma, subdural, chronic/ or hematoma, subdural, intracranial/ or subarachnoid hemorrhage, traumatic/ or exp pituitary apoplexy/ or exp subarachnoid hemorrhage/ or exp intracranial hypertension/ or exp trauma, nervous system/ or cerebrospinal fluid leak/ or cerebrospinal fluid otorrhea/ or cerebrospinal fluid rhinorrhea/ or coma, post-head injury/ or exp cranial nerve injuries/ or exp head injuries, closed/ or head injuries, penetrating/ or exp skull fractures/ or skull fracture, basilar/ or skull fracture, depressed/ or exp Cerebrovascular Trauma/ (236177)

7 (pneumocephal* or pneumo-cephal* or a?rocele* or pneumocyst* or pneumo-cyst* or ((CSF or cerebrospinal) adj3 (leak* or otorrhea* or rhinorrhea*)) or co?ntrecoup* or (co?ntre adj3 coup*)).mp. [mp=title, abstract, original title, name of substance word, subject heading word, keyword heading word, protocol supplementary concept word, rare disease supplementary concept word, unique identifier] (21868)

8 or/1-7 (464157)

9 exp africa, northern/ or algeria/ or egypt/ or libya/ or morocco/ or tunisia/ or south sudan/ or sudan/ or exp middle east/ or bahrain/ or iraq/ or jordan/ or kuwait/ or lebanon/ or oman/ or qatar/ or saudi arabia/ or syria/ or united arab emirates/ or yemen/ (129937)

10 (algeria* or bahrain* or egypt* or iraq* or jordan* or kuwait* or kuweit* or lebanon or lebanese or libanaise or yemen* or aden or sanaa or UAE or Emirat* or (abu adj dhabi) or libya* or morocco* or moroccan* or oman* or muscat or palestin* or gaza or (west adj bank) or qatar* or katar* or quatar* or saudi* or KSA or Syria* or tunisia* or (north* adj2 africa*) or sudan* or MENA or ((middle or near) adj2 east*) or (east* adj2 mediterranean*) or orient or arabs or arab or arabia or levant).mp. [mp=title, abstract, original title, name of substance word, subject heading word, keyword heading word, protocol supplementary concept word, rare disease supplementary concept word, unique identifier] (126940)

11 9 or 10 (190260)

12 8 and 11 (3196)

("middle east" OR "middle eastern" OR "north africa" OR "northern africa" OR algeria or bahrain or egypt or egyptian* or iraq or jordan or kuwait or lebanon or lebanese or yemen or aden or sanaa or UAE or emirates or dubai or libya or morocco or oman or muscat or palestin* or gaza or qatar or saudi* or KSA or syria or tunisia or sudan or MENA or orient or arabs or arab or arabia or levant) AND (neurosurgery OR neurosurgical OR neuro-surgery OR neuro-surgical OR neurosurgeries OR neuro-surgeries OR craniotomy OR craniotomies OR craniectomy OR craniotomies OR “decompressive craniectomy” OR “decompressive craniectomies” OR trephining OR trephinings OR trephining OR trepanation OR trepanning OR trephination OR TBI* OR mTBI* OR “Brain injury” OR “Brain injuries” OR “brains injury” OR “Brain trauma” OR “Brain traumas” OR “Brain concussion” OR “Brain Concussions” OR “Brain postconcussion” OR “Brain postconcussions” OR “Brain post-concussion” OR “Brain post-concussions” OR “Brain hemorrhage” OR “Brain haemorrhage” OR “Brain hemorrhages” OR “Brain haemorrhages” OR “Brain hematoma” OR “Brain hematomas” OR “Brain bleed” OR “Brain bleeds” OR “Brain bleeding” OR “Brain penetrate” OR “Brain penetrating” OR “Brain nonpenetrating” OR “Brain non-penetrating” OR “Brain lesion” OR “Brain lesions” OR “Brain swell” OR “Brain swelling” OR “Brain swellings” OR “Brain contusion” OR “Brain contusions” OR “encephalon injury” OR “encephalon injuries” OR “encephalons injury” OR “encephalon trauma” OR “encephalon traumas” OR “encephalon concussion” OR “encephalon Concussions” OR “encephalon postconcussion” OR “encephalon postconcussions” OR “encephalon post-concussion” OR “encephalon post-concussions” OR “encephalon hemorrhage” OR “encephalon haemorrhage” OR “encephalon hemorrhages” OR “encephalon haemorrhages” OR “encephalon hematoma” OR “encephalon hematomas” OR “encephalon bleed” OR “encephalon bleeds” OR “encephalon bleeding” OR “encephalon penetrate” OR “encephalon penetrating” OR “encephalon nonpenetrating” OR “encephalon non-penetrating” OR “encephalon lesion” OR “encephalon lesions” OR “encephalon swell” OR “encephalon swelling” OR “encephalon swellings” OR “encephalon contusion” OR “encephalon contusions” OR “cranium injury” OR “cranium injuries” OR “craniums” injury OR “cranium trauma” OR “cranium traumas” OR “cranium concussion” OR “cranium Concussions” OR “cranium postconcussion” OR “cranium postconcussions” OR “cranium post-concussion” OR “cranium post-concussions” OR “cranium hemorrhage” OR “cranium haemorrhage” OR “cranium hemorrhages” OR “cranium haemorrhages” OR “cranium hematoma” OR “cranium hematomas” OR “cranium bleed” OR “cranium bleeds” OR “cranium bleeding” OR “cranium penetrate” OR “cranium penetrating” OR “cranium nonpenetrating” OR “cranium non-penetrating” OR “cranium lesion” OR “cranium lesions” OR “cranium swell” OR “cranium swelling” OR “cranium swellings” OR “cranium contusion” OR “cranium contusions” OR “cranio injury” OR “cranio injuries” OR “cranios injury” OR “cranio trauma” OR “cranio traumas” OR “cranio concussion” OR “cranio Concussions” OR “cranio postconcussion” OR “cranio postconcussions” OR “cranio post-concussion” OR “cranio post-concussions” OR “cranio hemorrhage” OR “cranio haemorrhage” OR “cranio hemorrhages” OR “cranio haemorrhages” OR “cranio hematoma” OR “cranio hematomas” OR “cranio bleed” OR “cranio bleeds” OR “cranio bleeding” OR “cranio penetrate” OR “cranio penetrating” OR “cranio nonpenetrating” OR “cranio non-penetrating” OR “cranio lesion” OR “cranio lesions” OR “cranio swell” OR “cranio swelling” OR “cranio swellings” OR “cranio contusion” OR “cranio contusions” OR “cranial injury” OR “cranial injuries” OR “cranials injury” OR “cranial trauma” OR “cranial traumas” OR “cranial concussion” OR “cranial Concussions” OR “cranial postconcussion” OR “cranial postconcussions” OR “cranial post-concussion” OR “cranial post-concussions” OR “cranial hemorrhage” OR “cranial haemorrhage” OR “cranial hemorrhages” OR “cranial haemorrhages “ OR “cranial hematoma” OR “cranial hematomas” OR “cranial bleed” OR “cranial bleeds” OR “cranial bleeding” OR “cranial penetrate” OR “cranial penetrating” OR “cranial nonpenetrating” OR “cranial non-penetrating” OR “cranial lesion” OR “cranial lesions” OR “cranial swell” OR “cranial swelling” OR “cranial swellings” OR “cranial contusion” OR “cranial contusions” OR “intracranial injury” OR “intracranial injuries” OR “intracranials injury” OR “intracranial trauma” OR “intracranial traumas” OR “intracranial concussion” OR “intracranial Concussions” OR “intracranial postconcussion” OR “intracranial postconcussions” OR “intracranial post-concussion” OR “intracranial post-concussions” OR “intracranial hemorrhage” OR “intracranial haemorrhage” OR “intracranial hemorrhages” OR “intracranial haemorrhages” OR “intracranial hematoma” OR “intracranial hematomas” OR “intracranial bleed” OR “intracranial bleeds” OR “intracranial bleeding” OR “intracranial penetrate” OR “intracranial penetrating” OR “intracranial nonpenetrating” OR “intracranial non-penetrating” OR “intracranial lesion” OR “intracranial lesions” OR “intracranial swell” OR “intracranial swelling” OR “intracranial swellings” OR “intracranial contusion” OR “intracranial contusions” OR “intra-cranial injury” OR “intra-cranial injuries” OR “intra-cranials injury” OR “intra-cranial trauma” OR “intra-cranial traumas” OR “intra-cranial concussion” OR “intra-cranial Concussions” OR “intra-cranial postconcussion” OR “intra-cranial postconcussions” OR “intra-cranial post-concussion” OR “intra-cranial post-concussions” OR “intra-cranial hemorrhage” OR “intra-cranial haemorrhage” OR “intra-cranial hemorrhages” OR “intra-cranial haemorrhages” OR “intra-cranial hematoma” OR “intra-cranial hematomas” OR “intra-cranial bleed” OR “intra-cranial bleeds” OR “intra-cranial bleeding” OR “intra-cranial penetrate” OR “intra-cranial penetrating” OR “intra-cranial nonpenetrating” OR “intra-cranial non-penetrating” OR “intra-cranial lesion” OR “intra-cranial lesions” OR “intra-cranial swell” OR “intra-cranial swelling” OR “intra-cranial swellings” OR “intra-cranial contusion” OR “intra-cranial contusions” OR

“intracerebral injury” OR “intracerebral injuries” OR “intracerebrals injury” OR “intracerebral trauma” OR “intracerebral traumas” OR “intracerebral concussion” OR “intracerebral Concussions” OR “intracerebral postconcussion” OR “intracerebral postconcussions” OR “intracerebral post-concussion” OR “intracerebral post-concussions” OR “intracerebral hemorrhage” OR “intracerebral haemorrhage” OR “intracerebral hemorrhages” OR “intracerebral haemorrhages” OR “intracerebral hematoma” OR “intracerebral hematomas” OR “intracerebral bleed” OR “intracerebral bleeds” OR “intracerebral bleeding” OR “intracerebral penetrate” OR “ intracerebral penetrating” OR “intracerebral nonpenetrating” OR “ intracerebral non-penetrating” OR “intracerebral lesion” OR “intracerebral lesions” OR “intracerebral swell” OR “intracerebral swelling” OR “intracerebral swellings” OR “intracerebral contusion” OR “intracerebral contusions” OR “intra-cerebral” injury OR “intra-cerebral injuries” OR “intra-cerebrals injury” OR “intra-cerebral trauma” OR “intra-cerebral traumas” OR “intra-cerebral concussion” OR “intra-cerebral Concussions” OR “intra-cerebral postconcussion” OR “intra-cerebral postconcussions” OR “intra-cerebral post-concussion” OR “intra-cerebral post-concussions” OR “intra-cerebral hemorrhage” OR “intra-cerebral haemorrhage” OR “intra-cerebral hemorrhages” OR “intra-cerebral haemorrhages” OR “intra-cerebral hematoma” OR “intra-cerebral hematomas” OR “intra-cerebral bleed” OR “intra-cerebral bleeds” OR “intra-cerebral bleeding” OR “intra-cerebral penetrate” OR “intra-cerebral penetrating” OR “intra-cerebral nonpenetrating” OR “intra-cerebral non-penetrating” OR “intra-cerebral lesion” OR “intra-cerebral lesions” OR “intra-cerebral swell” OR “intra-cerebral swelling” OR “intra-cerebral swellings” OR “intra-cerebral contusion” OR “intra-cerebral contusions” OR “skull injury” OR “skull injuries” OR “skulls injury” OR “skull trauma” OR “skull traumas” OR “skull concussion” OR “skull Concussions” OR “skull postconcussion” OR “skull postconcussions” OR “skull post-concussion” OR “skull post-concussions” OR “skull hemorrhage” OR “skull haemorrhage” OR “skull hemorrhages” OR “skull haemorrhages” OR “skull hematoma” OR “skull hematomas” OR “skull bleed” OR “skull bleeds” OR “skull bleeding” OR “skull penetrate” OR “skull penetrating” OR “skull nonpenetrating” OR “skull non-penetrating” OR “skull lesion” OR “skull lesions” OR “skull swell” OR “skull swelling” OR “skull swellings” OR “skull contusion” OR “skull contusions” OR “cerebellar injury” OR “cerebellar injuries” OR “cerebellars injury” OR “cerebellar trauma” OR “cerebellar traumas” OR “cerebellar concussion” OR “cerebellar Concussions” OR “cerebellar postconcussion” OR “cerebellar postconcussions” OR “cerebellar post-concussion” OR “cerebellar post-concussions” OR “cerebellar hemorrhage” OR “cerebellar haemorrhage” OR “cerebellar hemorrhages” OR “cerebellar haemorrhages” OR “cerebellar hematoma” OR “cerebellar hematomas” OR “cerebellar bleed” OR “cerebellar bleeds” OR “cerebellar bleeding” OR “cerebellar penetrate” OR “cerebellar penetrating” OR “cerebellar nonpenetrating” OR “cerebellar non-penetrating” OR “cerebellar lesion” OR “cerebellar lesions” OR “cerebellar swell” OR “cerebellar swelling” OR “cerebellar swellings” OR “cerebellar contusion” OR “cerebellar contusions” OR “Cerebellum injury” OR “Cerebellum injuries” OR “Cerebellums injury” OR “Cerebellum trauma” OR “Cerebellum traumas” OR “Cerebellum concussion” OR “Cerebellum Concussions” OR “Cerebellum postconcussion” OR “Cerebellum postconcussions” OR “Cerebellum post-concussion” OR “Cerebellum post-concussions” OR “Cerebellum hemorrhage” OR “Cerebellum haemorrhage” OR “Cerebellum hemorrhages” OR “Cerebellum haemorrhages” OR “Cerebellum hematoma” OR “Cerebellum hematomas” OR “Cerebellum bleed” OR “Cerebellum bleeds” OR “Cerebellum bleeding” OR “Cerebellum penetrate” OR “Cerebellum penetrating” OR “Cerebellum nonpenetrating” OR “Cerebellum non-penetrating” OR “Cerebellum lesion” OR “Cerebellum lesions” OR “Cerebellum swell” OR “Cerebellum swelling” OR “Cerebellum swellings” OR “Cerebellum contusion” OR “Cerebellum contusions” OR “head injury” OR “head injuries” OR “heads injury” OR “head trauma” OR “head traumas” OR “head concussion” OR “head Concussions” OR “head postconcussion” OR “head postconcussions” OR “head post-concussion” OR “head post-concussions” OR “head hemorrhage” OR “head haemorrhage” OR “head hemorrhages” OR “head haemorrhages” OR “head hematoma” OR “head hematomas” OR “head bleed” OR “head bleeds” OR “head bleeding” OR “head penetrate” OR “head penetrating” OR “head nonpenetrating” OR “head non-penetrating” OR “head lesion” OR “head lesions” OR “head swell” OR “head swelling” OR “head swellings” OR “head contusion” OR “head contusions” OR “pontine injury” OR “pontine injuries” OR “pontines injury” OR “pontine trauma” OR “pontine traumas” OR “pontine concussion” OR “pontine Concussions” OR “pontine postconcussion” OR “pontine postconcussions” OR “pontine post-concussion” OR “pontine post-concussions” OR “pontine hemorrhage” OR “pontine haemorrhage” OR “pontine hemorrhages” OR “pontine haemorrhages” OR “pontine hematoma” OR “pontine hematomas” OR “pontine bleed” OR “pontine bleeds” OR “pontine bleeding” OR “pontine penetrate” OR “pontine penetrating” OR “pontine nonpenetrating” OR “pontine non-penetrating” OR “pontine lesion” OR “pontine lesions” OR “pontine swell” OR “pontine swelling” OR “pontine swellings” OR “pontine contusion” OR “pontine contusions” OR “putamen injury” OR “putamen injuries” OR “putamens injury” OR “putamen trauma” OR “putamen traumas” OR “putamen concussion” OR “putamen Concussions” OR “putamen postconcussion” OR “putamen postconcussions” OR “putamen post-concussion” OR “putamen post-concussions” OR “putamen hemorrhage” OR “putamen haemorrhage” OR “putamen hemorrhages” OR “putamen haemorrhages” OR “putamen hematoma” OR “putamen hematomas” OR “putamen bleed” OR “putamen bleeds” OR “putamen bleeding” OR “putamen penetrate” OR “putamen penetrating” OR “putamen nonpenetrating” OR “putamen non-penetrating” OR “putamen lesion” OR “putamen lesions” OR “putamen swell” OR “putamen swelling” OR “putamen swellings” OR “putamen contusion” OR “putamen contusions” OR “Putaminal injury” OR “Putaminal injuries” OR “Putaminals injury” OR “Putaminal trauma” OR “Putaminal traumas” OR “Putaminal concussion” OR “Putaminal Concussions” OR “Putaminal postconcussion” OR “Putaminal postconcussions” OR “Putaminal post-concussion” OR “Putaminal post-concussions” OR “Putaminal hemorrhage” OR “Putaminal haemorrhage” OR “Putaminal hemorrhages” OR “Putaminal haemorrhages” OR “Putaminal hematoma” OR “Putaminal hematomas” OR “Putaminal bleed” OR “Putaminal bleeds” OR “Putaminal bleeding” OR “Putaminal penetrate” OR “Putaminal penetrating” OR “Putaminal nonpenetrating” OR “Putaminal non-penetrating” OR “Putaminal lesion” OR “Putaminal lesions” OR “Putaminal swell” OR “Putaminal swelling” OR “Putaminal swellings” OR “Putaminal contusion” OR “Putaminal contusions” OR “dural injury” OR “dural injuries” OR “durals injury” OR “dural trauma” OR “dural traumas” OR “dural concussion” OR “dural Concussions” OR “dural postconcussion” OR “dural postconcussions” OR “dural post-concussion” OR “dural post-concussions” OR “dural hemorrhage” OR “dural haemorrhage” OR “dural hemorrhages” OR “dural haemorrhages” OR “dural hematoma” OR “dural hematomas” OR “dural bleed” OR “dural bleeds” OR “dural bleeding” OR “dural penetrate” OR “dural penetrating” OR “dural nonpenetrating” OR “dural non-penetrating” OR “dural lesion” OR “dural lesions” OR “dural swell” OR “dural swelling” OR “dural swellings” OR “dural contusion” OR “dural contusions” OR “subdural injury” OR “subdural injuries” OR “subdurals injury” OR “subdural trauma” OR “subdural traumas” OR “subdural concussion” OR “subdural Concussions” OR “subdural postconcussion” OR “subdural postconcussions” OR “subdural post-concussion” OR “subdural post-concussions” OR “subdural hemorrhage” OR “subdural haemorrhage” OR “subdural hemorrhages” OR “subdural haemorrhages” OR “subdural hematoma” OR “subdural hematomas” OR “subdural bleed” OR “subdural bleeds” OR “subdural bleeding” OR “subdural penetrate” OR “subdural penetrating” OR “subdural nonpenetrating” OR “subdural non-penetrating” OR “subdural lesion” OR “subdural lesions” OR “subdural swell” OR “subdural swelling” OR “subdural swellings” OR “subdural contusion” OR “subdural contusions” OR “sub-dural injury” OR “sub-dural injuries” OR “sub-durals injury” OR “sub-dural trauma” OR “sub-dural traumas” OR “sub-dural concussion” OR “sub-dural Concussions” OR “sub-dural postconcussion” OR “sub-dural postconcussions” OR “sub-dural post-concussion” OR “sub-dural post-concussions” OR “sub-dural hemorrhage” OR “sub-dural haemorrhage” OR “sub-dural hemorrhages” OR “sub-dural haemorrhages” OR “sub-dural hematoma” OR “sub-dural hematomas” OR “sub-dural bleed” OR “sub-dural bleeds” OR “sub-dural bleeding” OR “sub-dural penetrate” OR “sub-dural penetrating” OR “sub-dural nonpenetrating” OR “sub-dural non-penetrating” OR “sub-dural lesion” OR “sub-dural lesions” OR “sub-dural swell” OR “sub-dural swelling” OR “sub-dural swellings” OR “sub-dural contusion” OR “sub-dural contusions” OR “supradural injury” OR “supradural injuries” OR “supradurals injury” OR “supradural trauma” OR “supradural traumas” OR “supradural concussion” OR “supradural Concussions” OR “supradural postconcussion” OR “supradural postconcussions” OR “supradural post-concussion” OR “supradural post-concussions” OR “supradural hemorrhage” OR “supradural haemorrhage” OR “supradural hemorrhages” OR “supradural haemorrhages” OR “supradural hematoma” OR “supradural hematomas” OR “supradural bleed” OR “supradural bleeds” OR “supradural bleeding” OR “supradural penetrate” OR “supradural penetrating” OR “supradural nonpenetrating” OR “supradural non-penetrating” OR “supradural lesion” OR “supradural lesions” OR “sub supradural swell” OR “supradural swelling” OR “supradural swellings” OR “supradural contusion” OR “supradural contusions” OR “supra-dural injury” OR “supra-dural injuries” OR “supra-durals injury” OR “supra-dural trauma” OR “supra-dural traumas” OR “supra-dural concussion” OR “supra-dural Concussions” OR “supra-dural postconcussion” OR “supra-dural postconcussions” OR “supra-dural post-concussion” OR “supra-dural post-concussions” OR “supra-dural hemorrhage” OR “supra-dural haemorrhage” OR “supra-dural hemorrhages” OR “supra-dural haemorrhages” OR “supra-dural hematoma” OR “supra-dural hematomas” OR “supra-dural bleed” OR “supra-dural bleeds” OR “supra-dural bleeding” OR “supra-dural penetrate” OR “supra-dural penetrating” OR “supra-dural nonpenetrating” OR “supra-dural non-penetrating” OR “supra-dural lesion” OR “supra-dural lesions” OR “supra-dural swell” OR “supra-dural swelling” OR “supra-dural swellings” OR “supra-dural contusion” OR “supra-dural contusions” OR “epidural injury” OR “epidural injuries” OR “epidurals injury” OR “epidural trauma” OR “epidural traumas” OR “epidural concussion” OR “epidural Concussions” OR “epidural postconcussion” OR “epidural postconcussions” OR “epidural post-concussion” OR “epidural post-concussions” OR “epidural hemorrhage” OR “epidural haemorrhage” OR “epidural hemorrhages” OR “epidural haemorrhages” OR “epidural hematoma” OR “epidural hematomas” OR “epidural bleed” OR “epidural bleeds” OR “epidural bleeding” OR “epidural penetrate” OR “epidural penetrating” OR “epidural nonpenetrating” OR “epidural non-penetrating” OR “epidural lesion” OR “epidural lesions” OR “epidural swell” OR “epidural swelling” OR “epidural swellings” OR “epidural contusion” OR “epidural contusions” OR “epi-dural injury” OR “epi-dural injuries” OR “epi-durals injury” OR “epi-dural trauma” OR “epi-dural traumas” OR “epi-dural concussion” OR “epi-dural Concussions” OR “epi-dural postconcussion” OR “epi-dural postconcussions” OR “epi-dural post-concussion” OR “epi-dural post-concussions” OR “epi-dural hemorrhage” OR “epi-dural haemorrhage” OR “epi-dural hemorrhages” OR “epi-dural haemorrhages” OR “epi-dural hematoma” OR “epi-dural hematomas” OR “epi-dural bleed” OR “epi-dural bleeds” OR “epi-dural bleeding” OR “epi-dural penetrate” OR “epi-dural penetrating” OR “epi-dural nonpenetrating” OR “epi-dural non-penetrating” OR “epi-dural lesion” OR “epi-dural lesions” OR “epi-dural swell” OR “epi-dural swelling” OR “epi-dural swellings” OR “epi-dural contusion” OR “epi-dural contusions” OR “arachnoid injury” OR “arachnoid injuries” OR “arachnoids injury” OR “arachnoid trauma” OR “arachnoid traumas” OR “arachnoid concussion” OR “arachnoid Concussions” OR “arachnoid postconcussion” OR “arachnoid postconcussions” OR “arachnoid post-concussion” OR “arachnoid post-concussions” OR “arachnoid hemorrhage” OR “arachnoid haemorrhage” OR “arachnoid hemorrhages” OR “arachnoid haemorrhages” OR “arachnoid hematoma” OR “arachnoid hematomas” OR “arachnoid bleed” OR “arachnoid bleeds” OR “arachnoid bleeding” OR “arachnoid penetrate” OR “arachnoid penetrating” OR “arachnoid nonpenetrating” OR “arachnoid non-penetrating” OR “arachnoid lesion” OR “arachnoid lesions” OR “arachnoid swell” OR “arachnoid swelling” OR “arachnoid swellings” OR “arachnoid contusion” OR “arachnoid contusions” OR “arachnoidal injury” OR “arachnoidal injuries” OR “arachnoidals injury” OR “arachnoidal trauma” OR “arachnoidal traumas” OR “arachnoidal concussion” OR “arachnoidal Concussions” OR “arachnoidal postconcussion” OR “arachnoidal postconcussions” OR “arachnoidal post-concussion” OR “arachnoidal post-concussions” OR “arachnoidal hemorrhage” OR “arachnoidal haemorrhage” OR “arachnoidal hemorrhages” OR “arachnoidal haemorrhages” OR “arachnoidal hematoma” OR “arachnoidal hematomas” OR “arachnoidal bleed” OR “arachnoidal bleeds” OR “arachnoidal bleeding” OR “arachnoidal penetrate” OR “arachnoidal penetrating” OR “arachnoidal nonpenetrating” OR “arachnoidal non-penetrating” OR “arachnoidal lesion” OR “arachnoidal lesions” OR “arachnoidal swell” OR “arachnoidal swelling” OR “arachnoidal swellings” OR “arachnoidal contusion” OR “arachnoidal contusions” OR “subarachnoid injury” OR “subarachnoid injuries” OR “subarachnoids injury” OR “subarachnoid trauma” OR “subarachnoid traumas” OR “subarachnoid concussion” OR “subarachnoid Concussions” OR “subarachnoid postconcussion” OR “subarachnoid postconcussions” OR “subarachnoid post-concussion” OR “subarachnoid post-concussions” OR “subarachnoid hemorrhage” OR “subarachnoid haemorrhage” OR “subarachnoid hemorrhages” OR “subarachnoid haemorrhages” OR “subarachnoid hematoma” OR “subarachnoid hematomas” OR “subarachnoid bleed” OR “subarachnoid bleeds” OR “subarachnoid bleeding” OR “subarachnoid penetrate” OR “subarachnoid penetrating” OR “subarachnoid nonpenetrating” OR “subarachnoid non-penetrating” OR “subarachnoid lesion” OR “subarachnoid lesions” OR “subarachnoid swell” OR “subarachnoid swelling” OR “subarachnoid swellings” OR “subarachnoid contusion” OR “subarachnoid contusions” OR

“subarachnoidal injury” OR “subarachnoidal injuries” OR “subarachnoidals injury” OR “subarachnoidal trauma” OR “subarachnoidal traumas” OR “subarachnoidal concussion” OR “subarachnoidal Concussions” OR “subarachnoidal postconcussion” OR “subarachnoidal postconcussions” OR “subarachnoidal post-concussion” OR “subarachnoidal post-concussions” OR “subarachnoidal hemorrhage” OR “subarachnoidal haemorrhage” OR “subarachnoidal hemorrhages” OR “subarachnoidal haemorrhages” OR “subarachnoidal hematoma” OR “subarachnoidal hematomas” OR “subarachnoidal bleed” OR “subarachnoidal bleeds” OR “subarachnoidal bleeding” OR “subarachnoidal penetrate” OR “subarachnoidal penetrating” OR “subarachnoidal nonpenetrating” OR “subarachnoidal non-penetrating” OR “subarachnoidal lesion” OR “subarachnoidal lesions” OR “subarachnoidal swell” OR “subarachnoidal swelling” OR “subarachnoidal swellings” OR “subarachnoidal contusion” OR “subarachnoidal contusions” OR

“sub-arachnoid injury” OR “sub-arachnoid injuries” OR “sub-arachnoid injury” OR “sub-arachnoid trauma” OR “sub-arachnoid traumas” OR “sub-arachnoid concussion” OR “sub-arachnoid Concussions” OR “sub-arachnoid postconcussion” OR “sub-arachnoid postconcussions” OR “sub-arachnoid post-concussion” OR “sub-arachnoid post-concussions” OR “sub-arachnoid hemorrhage” OR “sub-arachnoid haemorrhage” OR “sub-arachnoid hemorrhages” OR “sub-arachnoid haemorrhages” OR “sub-arachnoid hematoma” OR “sub-arachnoid hematomas” OR “sub-arachnoid bleed” OR “sub-arachnoid bleeds” OR “sub-arachnoid bleeding” OR “sub-arachnoid penetrate” OR “sub-arachnoid penetrating” OR “sub-arachnoid nonpenetrating” OR “sub-arachnoid non-penetrating” OR “sub-arachnoid lesion” OR “sub-arachnoid lesions” OR “sub-arachnoid swell” OR “sub-arachnoid swelling” OR “sub-arachnoid swellings” OR “sub-arachnoid contusion” OR “sub-arachnoid contusions” OR “sub-arachnoidal injury” OR “sub-arachnoidal injuries” OR “sub-arachnoidals injury” OR “sub-arachnoidal trauma” OR “sub-arachnoidal traumas” OR “sub-arachnoidal concussion” OR “sub-arachnoidal Concussions” OR “sub-arachnoidal postconcussion” OR “sub-arachnoidal postconcussions” OR “sub-arachnoidal post-concussion” OR “sub-arachnoidal post-concussions” OR “sub-arachnoidal hemorrhage” OR “sub-arachnoidal haemorrhage” OR “sub-arachnoidal hemorrhages” OR “sub-arachnoidal haemorrhages” OR “sub-arachnoidal hematoma” OR “sub-arachnoidal hematomas” OR “sub-arachnoidal bleed” OR “sub-arachnoidal bleeds” OR “sub-arachnoidal bleeding” OR “sub-arachnoidal penetrate” OR “sub-arachnoidal penetrating” OR “sub-arachnoidal nonpenetrating” OR “sub-arachnoidal non-penetrating” OR “sub-arachnoid lesion” OR “sub-arachnoid lesions” OR “sub-arachnoid swell” OR “sub-arachnoid swelling” OR “sub-arachnoid swellings” OR “sub-arachnoid contusion” OR “sub-arachnoid contusions” OR “hemisphere injury” OR “hemisphere injuries” OR “hemisphere injury” OR “hemisphere trauma” OR “hemisphere traumas” OR “hemisphere concussion” OR “hemisphere Concussions” OR “hemisphere postconcussion” OR “hemisphere postconcussions” OR “hemisphere post-concussion” OR “hemisphere post-concussions” OR “hemisphere hemorrhage” OR “hemisphere haemorrhage” OR “hemisphere hemorrhages” OR “hemisphere haemorrhages” OR “hemisphere hematoma” OR “hemisphere hematomas” OR “hemisphere bleed” OR “hemisphere bleeds” OR “hemisphere bleeding” OR “hemisphere penetrate” OR “hemisphere penetrating” OR “hemisphere nonpenetrating” OR “hemisphere non-penetrating” OR “hemisphere lesion” OR “hemisphere lesions” OR “hemisphere swell” OR “hemisphere swelling” OR “hemisphere swellings” OR “hemisphere contusion” OR “hemisphere contusions” OR “hemispheres injury” OR “hemispheres injuries” OR “hemispheres injury” OR “hemispheres trauma” OR “hemispheres traumas” OR “hemispheres concussion” OR “hemispheres Concussions” OR “hemispheres postconcussion” OR “hemispheres postconcussions” OR “hemispheres post-concussion” OR “hemispheres post-concussions” OR “hemispheres hemorrhage” OR “hemispheres haemorrhage” OR “hemispheres hemorrhages” OR “hemispheres haemorrhages” OR “hemispheres hematoma” OR “hemispheres hematomas” OR “hemispheres bleed” OR “hemispheres bleeds” OR “hemispheres bleeding” OR “hemispheres penetrate” OR “hemispheres penetrating” OR “hemispheres nonpenetrating” OR “hemispheres non-penetrating” OR “hemispheres lesion” OR “hemispheres lesions” OR “hemispheres swell” OR “hemispheres swelling” OR “hemispheres swellings” OR “hemispheres contusion” OR “hemispheres contusions” OR “hemispheric injury” OR “hemispheric injuries” OR “hemispheric injury” OR “hemispheric trauma” OR “hemispheric traumas” OR “hemispheric concussion” OR “hemispheric Concussions” OR “hemispheric postconcussion” OR “hemispheric postconcussions” OR “hemispheric post-concussion” OR “hemispheric post-concussions” OR “hemispheric hemorrhage” OR “hemispheric haemorrhage” OR “hemispheric hemorrhages” OR “hemispheric haemorrhages” OR “hemispheric hematoma” OR “hemispheric hematomas” OR “hemispheric bleed” OR “hemispheric bleeds” OR “hemispheric bleeding” OR “hemispheric penetrate” OR “hemispheric penetrating” OR “hemispheric nonpenetrating” OR “hemispheric non-penetrating” OR “hemispheric lesion” OR “hemispheric lesions” OR “hemispheric swell” OR “hemispheric swelling” OR “hemispheric swellings” OR “hemispheric contusion” OR “hemispheric contusions” OR Pneumocephalus OR pneumocephalic OR pneumo-cephalus OR pneumo-cephalic OR aerocele OR airocele OR aeroceles OR airoceles OR pneumocyst OR pneumocysts OR pneumo-cyst OR pneumo-cysts OR “CSF leak” OR “CSF Otorrhea” OR “CSF rhinorrhea” OR “cerebrospinal fluid leak” OR “cerebrospinal fluid Otorrhea” OR “cerebrospinal fluid rhinorrhea” OR “cerebro-spinal fluid leak” OR “cerebro-spinal fluid Otorrhea” OR “cerebro-spinal fluid rhinorrhea” OR “cerebrospinal leak” OR “cerebrospinal Otorrhea” OR “cerebrospinal rhinorrhea” OR “cerebro-spinal leak” OR “cerebro-spinal Otorrhea” OR “cerebro-spinal rhinorrhea” OR contrecoup OR countercoup OR countercoups OR contre-coup OR counter-coup OR counter-coups)
